# Supplementary material
Source: PubMed Central journal article supplement (PMC4179097)
Supplement: peds.2014-0527_peds.2014-0527SupplementaryData.pdf [file peds.2014-0527_peds.2014-0527SupplementaryData.pdf]

## Supplemental Information

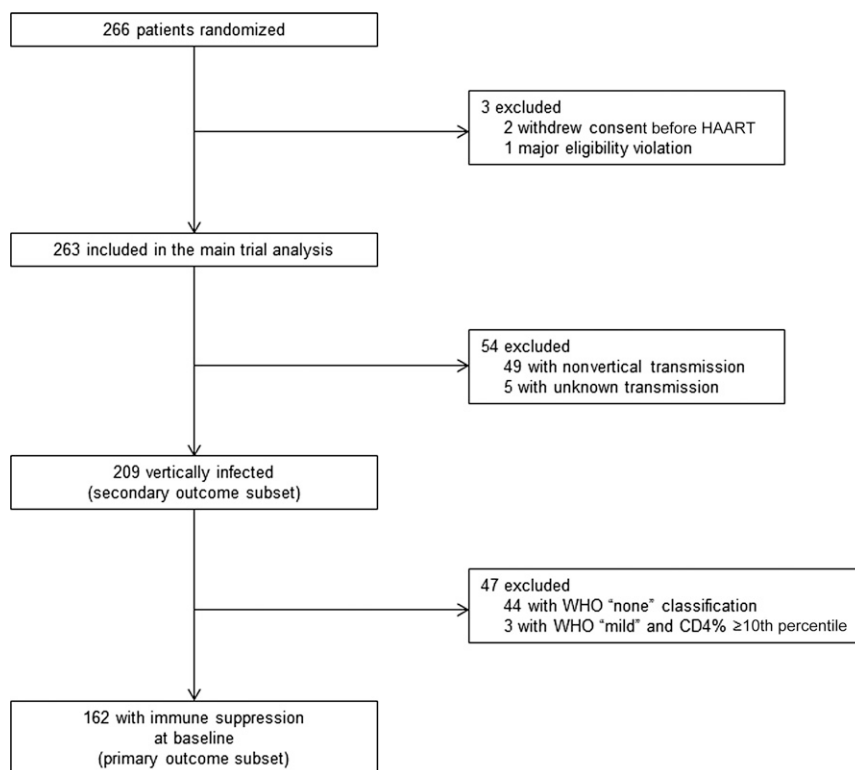

### SUPPLEMENTAL FIGURE 4

Study population subsets for primary and secondary outcomes.
